# Supplementary material for: Prognostic role and biologic features of Musashi-2 expression in colon polyps and during colorectal cancer progression
Source: PubMed Central journal article supplement (PMC8266110; doi:10.1371/journal.pone.0252132), 2021-07-08
Supplement: pone.0252132.s005.pdf [file pone.0252132.s005.pdf]

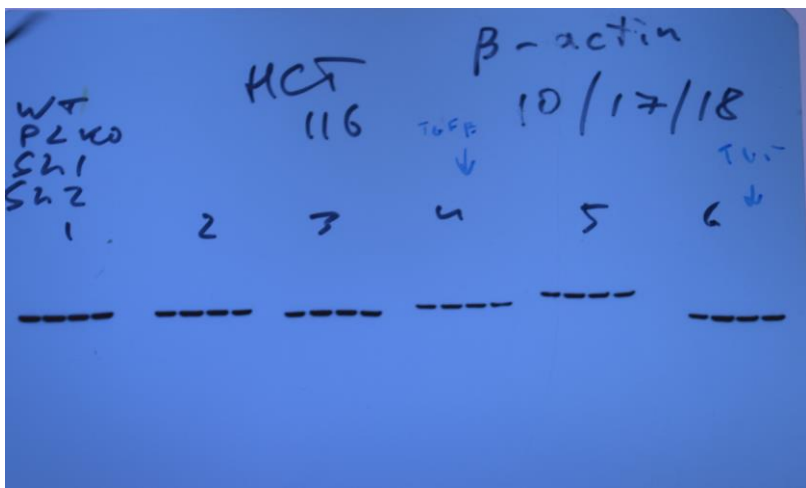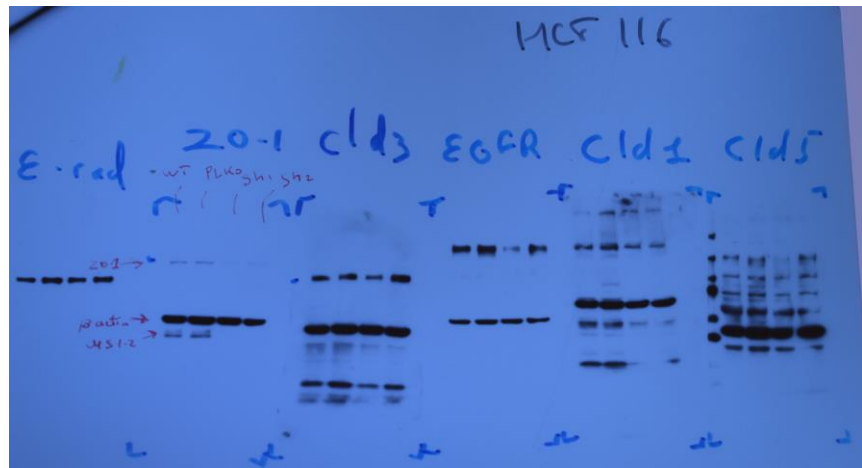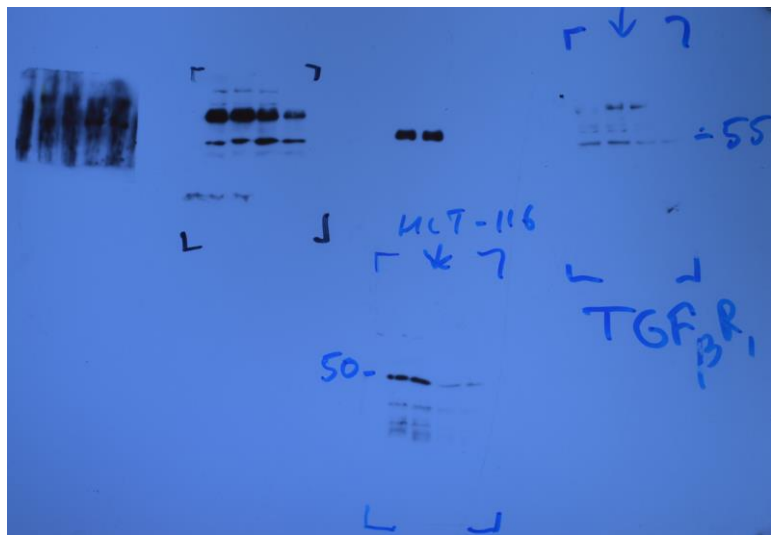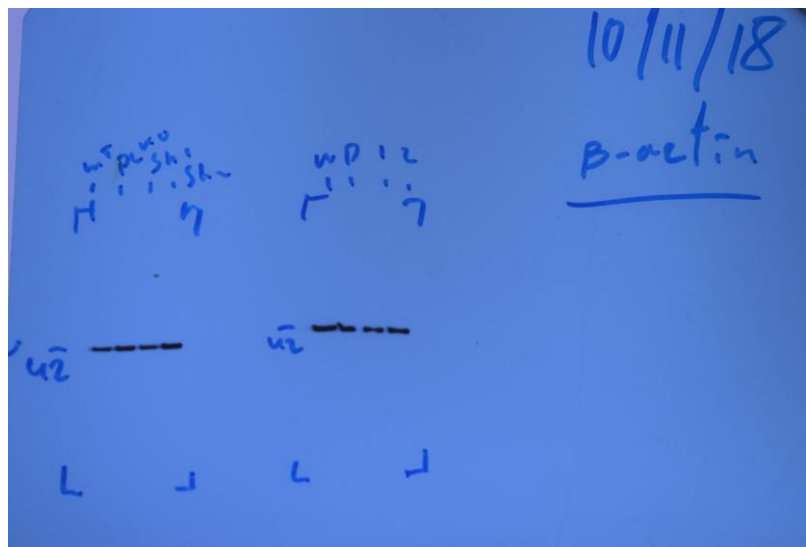

MCF-11G

E-cad EGFR

WT pl<sup>h</sup> sh1 sh2

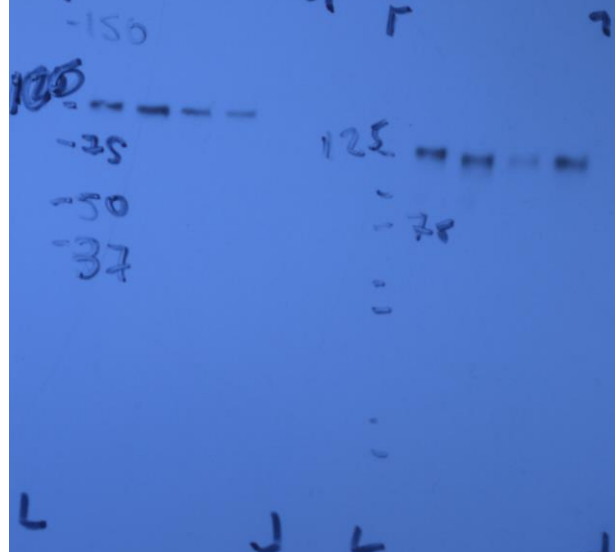

TGFBR

RKO

PIKO  
sh1  
sh2

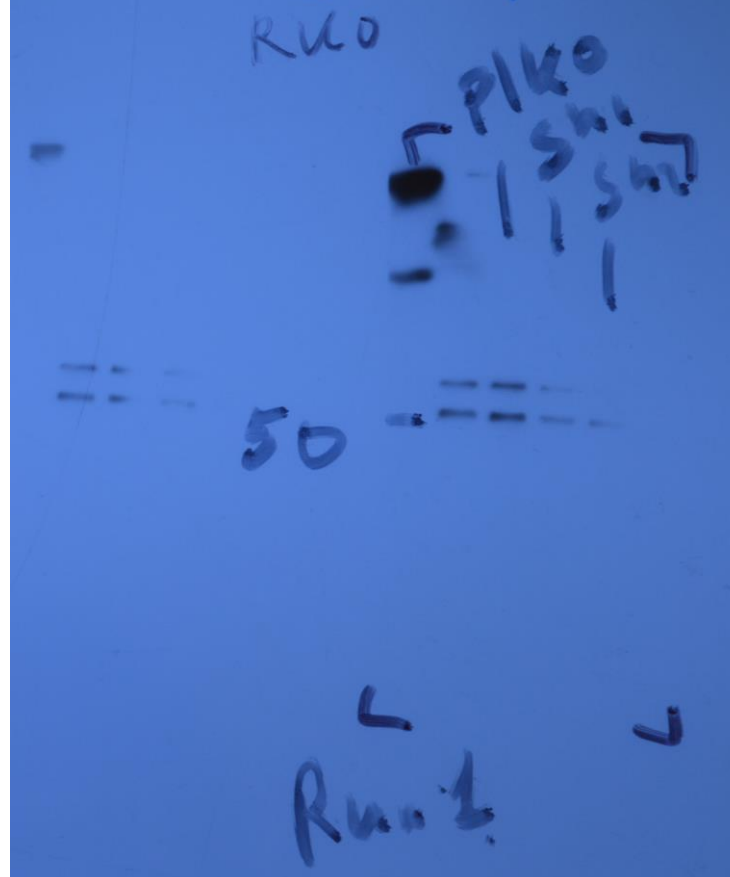

SYNTHESIS

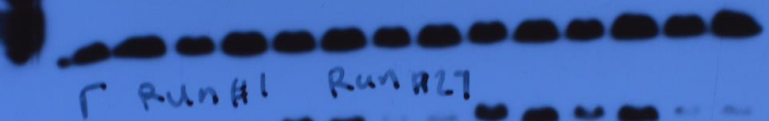

Run #1 Run #2  
 240 1 2 3 4 5 6 7 8

L  
 1,5-wt 20-1  
 2,6-plv  
 3,7-sh  
 4,8-sh2

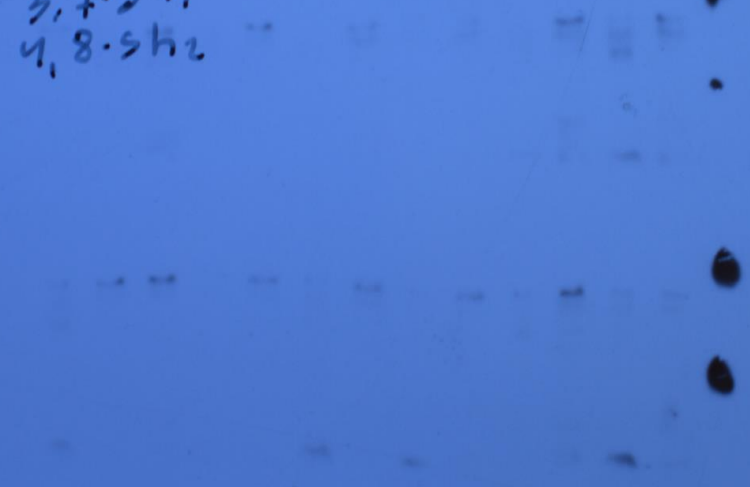

HCT-116  
cells

Plko sh1 sh2

Plko sh1 sh2

200

200

100

100

50

50

35

50

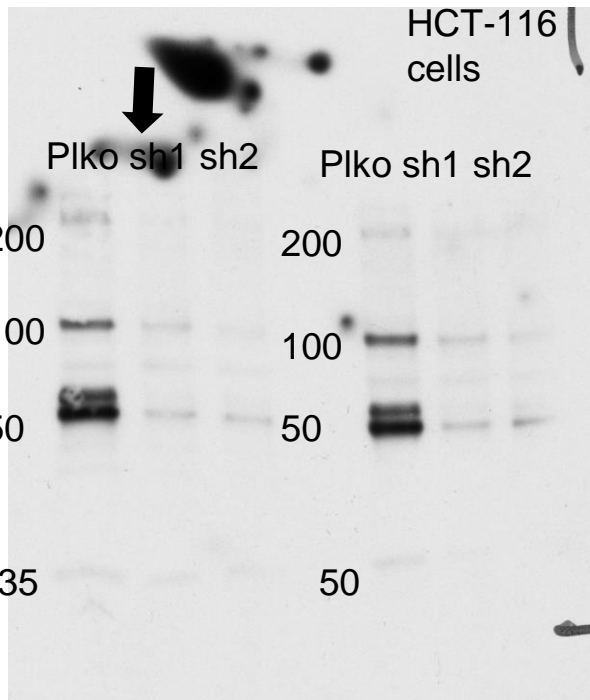

RKO

10/9/18

WT PLKO  
| |  
sh1 sh2  
| |  
L L

WT  
| PLKO  
| |  
sh1 sh2  
| |  
L L

100- EGFR

50- TGF $\beta$

32- MSi2

L

L

L

L
